# Supplementary material for: Cyclopalladated complexes of perylene imine: mononuclear complexes with five- or six-membered metallacycles
Source: Royal Society of Chemistry journal article supplement (doi:10.1039/c1dt10598a), 2011-01-01
Supplement: c1dt10598a.pdf [file c1dt10598a.pdf]

## Supporting Information

### **Cyclopalladated Complexes of Perylene Imine: Mononuclear Complexes with Six or Five-Membered Metallacycles**

**Pablo Espinet,\* Sergio Lentijo, and Jesús A. Miguel.\***

*IU CINQUIMA Química Inorgánica, Facultad de Ciencias, Universidad de Valladolid, 47071  
Valladolid, Spain.*

*IU CINQUIMA Química Inorgánica, Facultad de Ciencias, Universidad de Valladolid, 47071  
Valladolid, Sp*

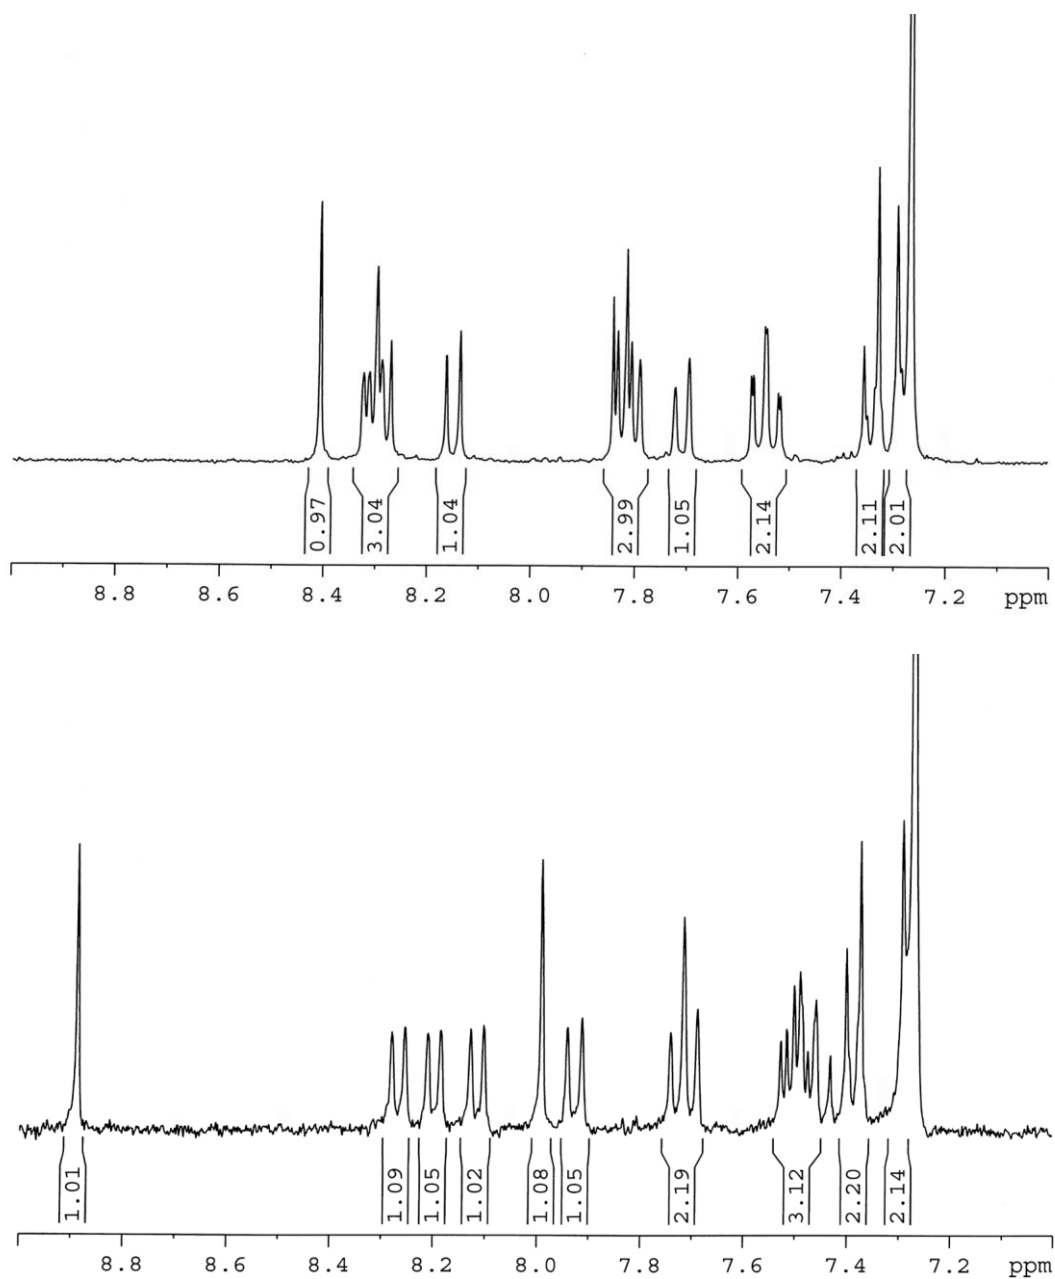

**Figura S1.** <sup>1</sup>H NMR spectra (aromatic hydrogen atoms) for the xanthate complexes **3** (top) and **8** (bottom).

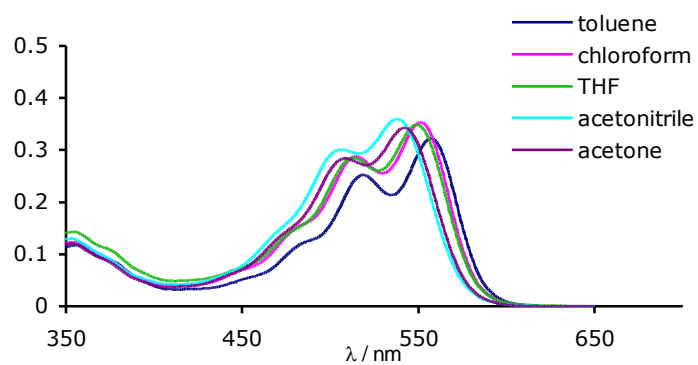

**Figure S2.** Absorption spectra of **7** in different solvents (ca.  $10^{-5}$  M) at room temperature.

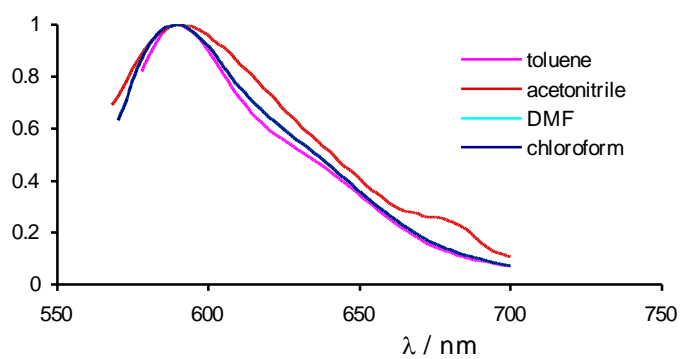

**Figure S3.** Emission spectra of **7** in different solvents (ca.  $10^{-5}$  M) at room temperature.
